# Supplementary material for: A Systematic Enhancer Screen Using Lentivector Transgenesis Identifies Conserved and Non-Conserved Functional Elements at the Olig1 and Olig2 Locus
Source: PubMed Central journal article supplement (PMC3012086; doi:10.1371/journal.pone.0015741), 2010-12-29
Supplement: pone.0015741.s001.pdf [file pone.0015741.s001.pdf]

**Table S1**

| <b>Chr 16 (Mm8) start</b> | <b>Chr 16 (Mm8) end</b> | <b>Clone ID</b> |
|---------------------------|-------------------------|-----------------|
| 90992462                  | 90995219                | 5H8             |
| 90992487                  | 90995219                | 5B7             |
| 90995220                  | 90997337                | 5I3             |
| 90995220                  | 90997339                | 5I2             |
| 90995502                  | 90997083                | 5I4             |
| 90999956                  | 91001783                | 5G1             |
| 91001974                  | 91003811                | 4bis            |
| 91003792                  | 91005208                | 6c              |
| 91005029                  | 91006312                | 5c              |
| 91006178                  | 91009107                | 7'              |
| 91009313                  | 91011553                | 5F5             |
| 91009408                  | 91012175                | 5L1             |
| 91009413                  | 91011740                | 5D4             |
| 91010795                  | 91013098                | 5B6             |
| 91013753                  | 91014547                | 9E11            |
| 91014243                  | 91016402                | 9'              |
| 91016413                  | 91018677                | 9A9             |
| 91016502                  | 91018759                | 6F7             |
| 91017256                  | 91019321                | 8G10            |
| 91017747                  | 91019919                | 5K5             |
| 91017932                  | 91020851                | 5B2             |
| 91021023                  | 91024244                | 5L3             |
| 91021143                  | 91024756                | 5L5             |
| 91023842                  | 91026455                | 8E3             |
| 91023959                  | 91026413                | 5K4             |
| 91024807                  | 91027134                | 7C5             |
| 91027385                  | 91029416                | 6E5             |
| 91028867                  | 91031500                | 11c             |
| 91031401                  | 91032315                | 11d             |
| 91032548                  | 91034365                | 5C7             |
| 91034777                  | 91038675                | 9F12            |
| 91036252                  | 91038654                | 9B3             |
| 91038522                  | 91041473                | 14'             |
| 91040534                  | 91042635                | 9B6             |
| 91041798                  | 91042701                | 9H12            |
| 91042573                  | 91045525                | 15'             |
| 91045517                  | 91048321                | 9D7             |
| 91048128                  | 91049593                | 17'             |
| 91049457                  | 91052518                | 5D6             |
| 91050089                  | 91051982                | 5L8             |
| 91051619                  | 91054051                | 8F7             |
| 91052568                  | 91056665                | 6L7             |
| 91052759                  | 91055215                | 5J6             |
| 91054035                  | 91055972                | 6E8             |
| 91056171                  | 91059711                | 7E9             |
| 91056984                  | 91059408                | 6K7             |
| 91059596                  | 91060795                | 18c             |
| 91060774                  | 91062326                | 8G2             |
| 91061492                  | 91063760                | 8A2             |
| 91065968                  | 91068486                | 20d             |
| 91068464                  | 91070853                | 21              |
| 91071964                  | 91073765                | 8B5             |
| 91074712                  | 91076395                | 8G1             |
| 91076912                  | 91078546                | 24              |
| 91078438                  | 91080339                | 7D7             |
| 91080093                  | 91082418                | 25              |
| 91082413                  | 91085986                | 5H4             |
| 91082802                  | 91085986                | 8H5             |
| 91084287                  | 91087566                | 8F9             |
| 91085935                  | 91088116                | 6L4             |
| 91087971                  | 91089883                | 26              |
| 91090067                  | 91092760                | 5I6             |
| 91090560                  | 91092790                | 8H3             |
| 91092940                  | 91095282                | 9E7             |
| 91095033                  | 91096114                | 28              |
| 91095283                  | 91099109                | 9A4             |
| 91096078                  | 91097808                | 5A5             |
| 91097068                  | 91100177                | 5F7             |
| 91097434                  | 91099130                | Mm5F7CNC        |
| 91097822                  | 91101241                | 10B3            |

|          |          |       |
|----------|----------|-------|
| 91100121 | 91103069 | 29    |
| 91101872 | 91104576 | 9H6   |
| 91104717 | 91106432 | 30c   |
| 91106384 | 91108466 | 6D7   |
| 91109637 | 91111538 | 6K1   |
| 91111221 | 91114051 | 31bis |
| 91113549 | 91116166 | 10A4  |
| 91113986 | 91116489 | 6B2   |
| 91114735 | 91116792 | 5B1   |
| 91114879 | 91116792 | 5G5   |
| 91116184 | 91118570 | 10A7  |
| 91116258 | 91119250 | 7G5   |
| 91116345 | 91119382 | 5A3   |
| 91119296 | 91121563 | 7C10  |
| 91119649 | 91122250 | 5D2   |
| 91119826 | 91122275 | 8C10  |
| 91120775 | 91123842 | 10A3  |
| 91123023 | 91125665 | 9B7   |
| 91125129 | 91127152 | 5D7   |
| 91127226 | 91130678 | 6G5   |
| 91127458 | 91129681 | 9D11  |
| 91130945 | 91132689 | 5A1   |
| 91130945 | 91132689 | 5D1   |
| 91132446 | 91134607 | 5K8   |
| 91132624 | 91134636 | 5F2   |
| 91134640 | 91136328 | 33    |
| 91135691 | 91137979 | 10B7  |
| 91136300 | 91137194 | 34    |
| 91137124 | 91139662 | 10A2  |
| 91138022 | 91140442 | 6J6   |
| 91145978 | 91148056 | 9C8   |
| 91147945 | 91149943 | 36'   |
| 91149913 | 91152319 | 37    |
| 91152306 | 91153625 | 38    |
| 91153618 | 91156723 | 5L4   |
| 91155139 | 91157882 | 5B3   |
| 91155228 | 91157840 | 5C3   |
| 91157209 | 91159549 | 5A7   |
| 91158569 | 91160533 | 6L1   |
| 91159441 | 91161886 | 10B2  |
| 91159456 | 91161383 | 8E11  |
| 91162463 | 91165047 | 6F4   |
| 91163066 | 91165057 | 7G11  |
| 91163375 | 91166325 | 6E1   |
| 91164390 | 91166475 | 10A1  |
| 91164838 | 91167002 | 7F7   |
| 91165080 | 91167632 | 6B1   |
| 91166522 | 91168984 | 5G6   |
| 91166583 | 91168972 | 5G7   |
| 91168261 | 91170385 | 9G6   |
| 91169486 | 91171384 | 5C5   |
| 91171699 | 91174038 | 8B10  |
| 91171825 | 91174065 | 8A1   |
| 91176911 | 91178881 | 8D5   |
| 91179971 | 91182599 | 45    |
| 91181242 | 91184052 | 5I7   |
| 91184260 | 91188053 | 6E6   |
| 91184946 | 91187860 | 7B8   |
| 91184993 | 91187204 | 8D6   |
| 91185129 | 91187717 | 8D10  |
| 91186024 | 91189770 | 8D4   |
| 91189427 | 91191182 | 55    |
| 91190549 | 91192157 | 8H4   |
| 91192647 | 91195233 | 53    |
| 91195094 | 91197673 | 42d   |
| 91198559 | 91201334 | 7E1   |
| 91200259 | 91202576 | 5F6   |
| 91200560 | 91203773 | 5L2   |
| 91200888 | 91203018 | 9E12  |
| 91208048 | 91210312 | 54    |

---
