# Supplementary material for: A Systematic Enhancer Screen Using Lentivector Transgenesis Identifies Conserved and Non-Conserved Functional Elements at the Olig1 and Olig2 Locus
Source: PubMed Central journal article supplement (PMC3012086; doi:10.1371/journal.pone.0015741), 2010-12-29
Supplement: pone.0015741.s002.pdf [file pone.0015741.s002.pdf]

**Table S2**

| Clone ID | Genotyping primer           | Orientation | Pool |
|----------|-----------------------------|-------------|------|
| 6L7      | AGAGGGGAGAGGAGGGCAGA        | -           | A    |
| 6L4      | CGATGACAGGCCTGCTAATGAC      | -           | A    |
| 5I6      | CATGCTTCTGTCAAGAGGCACTCC    | +           | A    |
| 5F7      | TCCAATGTACAGCCCTGGCCTA      | -           | A    |
| 6D7      | TTTCTGTCGTGTGTCTATGCCATTACT | -           | A    |
| 6K1      | GCATTTCAAGTGGCCAGGATCA      | +           | A    |
| 6B2      | GCGGGAACAATGTGCTTTTCCT      | -           | A    |
| 5D2      | TCCTTGGACCCGAGTACCTGAA      | +           | A    |
| 5A7      | CCCTAAAGCTCCCTCCCTTGC       | +           | A    |
| 5H8      | GGTCCCTCTGTTTCCCACCTCT      | -           | B    |
| 5I2      | CCTAATCACGCGGAAATCTTGC      | +           | B    |
| 5G1      | TATCGTGGGTGTGCCAGACACT      | +           | B    |
| 6F7      | ATTCCCCTGGGTAGGCAGAGAG      | -           | B    |
| 5C7      | TGAGCAGGTAGAAAACCCTTTCATTC  | -           | B    |
| 5D6      | AAAGGGTCTATCCTGAGCCTTGC     | -           | B    |
| 7D7      | CCCGTCAGTGTTCCAGGGAGAAG     | -           | B    |
| 5A5      | CACGGCCCTAGGACTGTTTTGT      | -           | B    |
| 5I7      | TCATTGACCTCTTTAGGCTTTCTTCA  | -           | B    |
| 6E6      | GGGGTTTGAAGACTGCTGGCTA      | +           | B    |
| 5L1      | ATCCAGGTTAATGCGGGGACTT      | -           | C    |
| 5B2      | TCTACGGCAGAGTCGTGGTGAG      | +           | C    |
| 5A3      | GGTAGCTCTGGGACAAGAACG       | +           | C    |
| 5D7      | GCTTTCTGGCAGCTACAAAAGGA     | +           | C    |
| 6G5      | TGCTGCAATGAAAGTCAGACAAA     | +           | C    |
| 5A1      | GCCATATGCCAGGTGGAGAAAG      | -           | C    |
| 5F2      | TCTTCCTTTGTGTCCGCATTGA      | +           | C    |
| 6J6      | GGGCCCTCTCCTAAAAGCATGT      | -           | C    |
| 5L4      | AAAGCTCCACCTGAGGGTGACA      | +           | C    |
| 6F4      | GAAGGACTTTCCTCCAGCCACA      | +           | C    |
| 5I3      | AGGGTAGGGTAAGGCATGCACA      | -           | D    |
| 7C5      | AAAGCAGAGTCCGGGATTGTTG      | -           | D    |
| 6E5      | GACTCCGCTTTGAAGCAGTTCC      | +           | D    |
| 5J6      | CGAGTAATGGAAGCCCAGGTTG      | +           | D    |
| 7E9      | GGTCCAGCCCTGTGTTTAGCA       | +           | D    |
| 8B5      | CCATCACGTAAGTTCCCGCATT      | +           | D    |
| 5H4      | CATCACTCCCTTGCCTCTCTCC      | -           | D    |
| 6L1      | CTGCTGCTGCTGTTCTCTTTG       | -           | D    |
| 6B1      | GGGGATGCTGGTGTAAGGAGA       | -           | D    |
| 5L2      | CCCCAACAACTAGCAAATGAGTCC    | +           | D    |
| 5B6      | GGGGCTACTCTATCCACCAGCAT     | +           | E    |
| 5K4      | ATCGTGCTTTGAGCCTCTCTCCT     | +           | E    |
| 6E8      | AGGGGTCAGGTATCTGCTGCTTT     | -           | E    |
| 8A2      | CTGGCAGGGATGGAGACAAAAG      | +           | E    |
| 5G6      | CCCATTGCTTACCTGTGACTTGC     | -           | E    |
| 5C5      | TTCCATGACCACATTCCCTGCTTT    | -           | E    |
| 8B10     | GATGCAGAGTTGCAGGTTGAACA     | +           | E    |
| 8D5      | TTTAGCATGGCCTCAGGATGTG      | -           | E    |
| 8D4      | GAGGTTGAAGGGTGCCTCTTGTT     | -           | E    |
| 7E1      | TTTCACTAGGGGCCAAAATAGTAGA   | +           | E    |
| 5I3      | TCACACTGGCCTTTCCAGTTCTC     | +           | F    |
| 5B2      | ATGGTTAATGTGAGCCACGCTGT     | +           | F    |
| 9B3      | TTGCTCCTTTGTTTCAGTTCATCAGA  | +           | F    |
| 9B6      | TCTGCAACTGGAGACCCTGAAAC     | +           | F    |

|       |                            |   |   |
|-------|----------------------------|---|---|
| 8G2   | TGGAACACAAAGGGAAAACACCA    | + | F |
| 8G1   | ACGTGAAAGTGGGCATACAGCAT    | - | F |
| 28    | AGCTGTGTGGTTCTCACTGGACA    | + | F |
| 5G5   | CCCAGGGATGATCTAAGCTCTCG    | - | F |
| 7C10  | TGTCCCTGGCACACTAAAGTCCT    | - | F |
| 9B7   | CTTGTGGGAATCACAGTCCCTTG    | - | F |
| 5K8   | CCTTCATATAACCCTGCAATCATGC  | + | F |
| 9C8   | TGGCTCTTACAGGGAAAAGCTCTG   | + | F |
| 37    | ATACAAGCCCAAACACTGGCAGA    | - | F |
| 5L4   | AGTGTCACTTTGCTTCCCGTCTG    | + | F |
| 5B3   | CCGGGGTGATATTTACCAAGGTG    | + | F |
| 8E11  | ACTGTTGGGGAGCAGCTCTTAGG    | - | F |
| 45    | AAAAGAAGCCCCAAACATCTTGAA   | - | F |
| 8H4   | AAACTGAGGCACAAAAGGCATTGA   | - | F |
| 5F6   | AAGCATGCATGGTCTGTGTCCTT    | - | F |
| 6E6   | GGGGTTTGAAGACTGCTGGCTA     | + | F |
| 9E11  | CTGTGGACCTGAAACCAATGGAC    | + | G |
| 9F12  | CCTGGCATTCCATGGTTGATTG     | - | G |
| 9E7   | GCTTGCAGAACTTAGCCTTGTGC    | - | G |
| 9H6   | GATGCAGAGGTGTGTCCCTTCAG    | + | G |
| 31bis | CTGGGAATGGAGAGTTCACTTGC    | - | G |
| 10A3  | CAAGGGACTGTGATTCCCACAAG    | + | G |
| 10B7  | GCGCTGTTAGAGTTCAGGGACAC    | + | G |
| 10A2  | GAACAAGGGTGCCGAGGTTAGAC    | + | G |
| 7G11  | TGGCTGAGATTCCAACTTGAGG     | - | G |
| 6E1   | CGCCTTGATTTTCCATCAGACAG    | - | G |
| 9G6   | AAGCCCTCCACAGGAAGAGTTTG    | - | G |
| 5I7   | TCATTGACCTCTTTAGGCTTTCTTCA | - | G |
| 6E8   | AGGGGTCAGGTATCTGCTGCTTT    | - | G |
| 7C10  | TGTCCCTGGCACACTAAAGTCCT    | - | G |
| 7E1   | TTTCACCTAGGGGCCAAAATAGTAGA | + | G |
| 8D5   | TTCTAGCATGGCCTCAGGATGTG    | - | G |
| 8D4   | GAGGTTGAAGGGTGCCTCTTGTT    | - | G |
| 8G2   | TGGAACACAAAGGGAAAACACCA    | + | G |
| 8G1   | ACGTGAAAGTGGGCATACAGCAT    | - | G |
| 45    | AAAAGAAGCCCCAAACATCTTGAA   | - | G |
| 5L1   | ATCCAGGTTAATGCGGGGACTT     | - | H |
| 55    | ACCCACCTTCTTCTCTCCCCTTC    | - | H |
| 11c   | CCCGCCTTCTAAATCCAGTTGAG    | - | H |
| 14'   | GGAAATCCTGCCTAAGACAGTTGG   | + | H |
| 26    | TCCTACTGCCTCAGCCTATCGTG    | - | H |
| 7'    | GGCTTCCACGGTGTGCTCTATATC   | + | H |
| 9'    | TGAGCTCTCCCATGAGGTTTCTG    | - | H |
| 25    | GCCCCAGCTCCCAACATAAATAG    | - | H |
| 29    | AGCCTAGGGCTCTGTTGGATGTC    | - | H |
| 31bis | ATACTTTTCGCCGGTGTGAGGAT    | - | H |
| 33    | AGTTGCACCCTCAACTCCAAGAC    | + | H |
| 34    | GCGCTGTTAGAGTTCAGGGACAC    | + | H |
| 38    | GGGGCGTTCCCTAGACTAACAAA    | - | H |
| 53    | CTGACACCTGCAGAAAGTGACCA    | - | H |
| 54    | ATTAGGAGGTCAGGGGCATTTGA    | - | H |
| 6c    | GTCATTGCAGACATGGTGGTGAC    | + | H |
| 30c   | GGGCAGGACTTTTAAATGGAGCAC   | - | H |
| 20d   | CTGTCTCACGGTAGGGGACAGAC    | - | H |
| 5c    | AAAGGGAAAAGCTTGTGGGAACTG   | + | H |
| 42d   | TGTTGTCACCTTAGATGGCTCTGG   | - | H |
