# Supplementary material for: A Systematic Enhancer Screen Using Lentivector Transgenesis Identifies Conserved and Non-Conserved Functional Elements at the Olig1 and Olig2 Locus
Source: PubMed Central journal article supplement (PMC3012086; doi:10.1371/journal.pone.0015741), 2010-12-29
Supplement: pone.0015741.s003.pdf [file pone.0015741.s003.pdf]

**Table S3**

| <b>Start (Mm8)</b> | <b>End (Mm8)</b> | <b>Clone ID</b> | <b>Pool</b> | <b>Injected twice</b> | <b>Integrated</b> |
|--------------------|------------------|-----------------|-------------|-----------------------|-------------------|
| 91052568           | 91056665         | L7-356-P18.6    | A           |                       | n                 |
| 91085935           | 91088116         | L4-356-P18.6    | A           |                       | y                 |
| 91090067           | 91092760         | i06-356P18.5    | A           |                       | y                 |
| 91097068           | 91100177         | F07-356P18.5    | A           |                       | y                 |
| 91106384           | 91108466         | D7-356-P18.6    | A           |                       | y                 |
| 91109637           | 91111538         | K1-356-P18.6    | A           |                       | y                 |
| 91113986           | 91116489         | B2-356-P18.6    | A           |                       | y                 |
| 91119649           | 91122250         | D02-356P18.5    | A           |                       | y                 |
| 91157209           | 91159549         | A07-356P18.5    | A           |                       | y                 |
| 90992462           | 90995219         | H08-356P18.5    | B           |                       | y                 |
| 90995220           | 90997339         | I2-356P18.5     | B           |                       | n                 |
| 90999956           | 91001783         | G01-356P18.5    | B           |                       | y                 |
| 91016502           | 91018759         | F7-356-P18.6    | B           |                       | y                 |
| 91032548           | 91034365         | C07-356P18.5    | B           |                       | y                 |
| 91049457           | 91052518         | D06-356P18.5    | B           |                       | y                 |
| 91078438           | 91080339         | D7-356P18.7     | B           |                       | y                 |
| 91096078           | 91097808         | A5-356P18.5     | B           |                       | y                 |
| 91181242           | 91184052         | i07-356P18.5    | B           | x                     | n                 |
| 91184260           | 91188053         | E6-356-P18.6    | B           | x                     | n                 |
| 91009408           | 91012175         | L01-356P18.5    | C           | x                     | n                 |
| 91017932           | 91020851         | B02-356P18.5    | C           | x                     | n                 |
| 91116345           | 91119382         | A3-356P18.5     | C           |                       | y                 |
| 91125129           | 91127152         | D07-356P18.5    | C           |                       | y                 |
| 91127226           | 91130678         | G5-356-P18.6    | C           |                       | y                 |
| 91130945           | 91132689         | A01-356P18.5    | C           |                       | y                 |
| 91132624           | 91134636         | F02-356P18.5    | C           |                       | n                 |
| 91138022           | 91140442         | J6-356-P18.6    | C           |                       | y                 |
| 91153618           | 91156723         | L04-356P18.5    | C           | x                     | y                 |
| 91162463           | 91165047         | F4-356-P18.6    | C           |                       | n                 |
| 91021023           | 91024244         | L03-356P18.5    | D           |                       | y                 |
| 91024807           | 91027134         | 356P18.7.C5     | D           |                       | y                 |
| 91027385           | 91029416         | E5-356-P18.6    | D           |                       | y                 |
| 91052759           | 91055215         | J6-356P18.5     | D           |                       | y                 |
| 91056171           | 91059711         | 356P18.7E9      | D           |                       | y                 |
| 91071964           | 91073765         | 356.P18.8.B5    | D           |                       | y                 |
| 91082413           | 91085986         | H04-356P18.5    | D           |                       | y                 |
| 91158569           | 91160533         | L1-356-P18.6    | D           |                       | y                 |
| 91165080           | 91167632         | B1-356-P18.6    | D           |                       | y                 |
| 91200560           | 91203773         | L2-356-P18.5    | D           |                       | y                 |
| 91010795           | 91013098         | B06-356P18.5    | E           |                       | y                 |
| 91023959           | 91026413         | K4-356P18.5     | E           |                       | y                 |
| 91054035           | 91055972         | E8-356-P18.6    | E           | x                     | n                 |
| 91061492           | 91063760         | A2-356P18.8     | E           |                       | y                 |
| 91166522           | 91168984         | G06-356P18.5    | E           |                       | y                 |
| 91169486           | 91171384         | C05-356P18.5    | E           |                       | y                 |
| 91171699           | 91174038         | 356.P18.8.B10   | E           |                       | y                 |
| 91176911           | 91178881         | 356P18.8D5      | E           | x                     | n                 |
| 91186024           | 91189770         | 356P18.8D4      | E           | x                     | n                 |
| 91198559           | 91201334         | 356P18.7E1      | E           | x                     | n                 |
| 90995220           | 90997337         | i03-356P18.5    | F           |                       | y                 |
| 91017932           | 91020851         | B02-356P18.5    | F           | x                     | y                 |
| 91036252           | 91038654         | 356.P18.9-B3    | F           |                       | y                 |
| 91040534           | 91042635         | 356.P18.9-B6    | F           |                       | y                 |
| 91060774           | 91062326         | 356.P18.8.G2    | F           | x                     | n                 |
| 91074712           | 91076395         | 356.P18.8.G1    | F           | x                     | n                 |

|          |          |               |   |   |   |
|----------|----------|---------------|---|---|---|
| 91095033 | 91096114 | 28            | F |   | y |
| 91114879 | 91116792 | G05-356P18.5  | F |   | y |
| 91119296 | 91121563 | 356P18.7.C10  | F | x | n |
| 91123023 | 91125665 | 356.P18.9-B7  | F |   | y |
| 91132446 | 91134607 | K8-356P18.5   | F |   | y |
| 91145978 | 91148056 | 356.P18.9-C8  | F |   | y |
| 91149913 | 91152319 | 37            | F |   | y |
| 91153618 | 91156723 | L04-356P18.5  | F | x | y |
| 91155139 | 91157882 | B03-356P18.5  | F |   | y |
| 91159456 | 91161383 | 356.P18.8.E11 | F |   | y |
| 91179971 | 91182599 | 45            | F | x | n |
| 91184260 | 91188053 | E6-356-P18.6  | F | x | n |
| 91190549 | 91192157 | 356.P18.8.H4  | F |   | y |
| 91200259 | 91202576 | F06-356P18.5  | F |   | y |
| 91013753 | 91014547 | 356P18.9E11   | G |   | y |
| 91034777 | 91038675 | 356P18.9-F12  | G |   | y |
| 91054035 | 91055972 | E8-356-P18.6  | G | x | y |
| 91060774 | 91062326 | 356.P18.8.G2  | G | x | n |
| 91074712 | 91076395 | 356.P18.8.G1  | G | x | n |
| 91092940 | 91095282 | 356P18.9E7    | G |   | y |
| 91101872 | 91104576 | 356P18.9H6    | G |   | n |
| 91111221 | 91114051 | 31bis         | G | x | y |
| 91119296 | 91121563 | 356P18.7.C10  | G | x | n |
| 91120775 | 91123842 | 356P18.10-A3  | G |   | y |
| 91135691 | 91137979 | 356P18.10-B7  | G |   | n |
| 91137124 | 91139662 | 356P18.10-A2  | G |   | n |
| 91163066 | 91165057 | 356P18.7-G11  | G |   | y |
| 91163375 | 91166325 | E1-356-P18.6  | G |   | y |
| 91168261 | 91170385 | 356P18.9G6    | G |   | n |
| 91176911 | 91178881 | 356P18.8D5    | G | x | y |
| 91181242 | 91184052 | i07-356P18.5  | G | x | y |
| 91186024 | 91189770 | 356P18.8D4    | G | x | y |
| 91198559 | 91201334 | 356P18.7E1    | G | x | y |
| 91179971 | 91182599 | 45            | G | x | n |
| 91003792 | 91005208 | 6c            | H |   | y |
| 91005029 | 91006312 | 5c            | H |   | y |
| 91006178 | 91009107 | 7'            | H |   | y |
| 91009408 | 91012175 | L01-356P18.5  | H | x | y |
| 91014243 | 91016402 | 9'            | H |   | y |
| 91028867 | 91031500 | 11c           | H |   | y |
| 91038522 | 91041473 | 14'           | H |   | y |
| 91065968 | 91068486 | 20d           | H |   | y |
| 91080093 | 91082418 | 25            | H |   | y |
| 91087971 | 91089883 | 26            | H |   | y |
| 91100121 | 91103069 | 29            | H |   | y |
| 91104717 | 91106432 | 30c           | H |   | y |
| 91111221 | 91114051 | 31bis         | H | x | y |
| 91134640 | 91136328 | 33            | H |   | y |
| 91136300 | 91137194 | 34            | H |   | y |
| 91152306 | 91153625 | 38            | H |   | y |
| 91189427 | 91191182 | 55            | H |   | n |
| 91192647 | 91195233 | 53            | H |   | y |
| 91195094 | 91197673 | 42d           | H |   | y |
| 91208048 | 91210312 | 54            | H |   | y |
