# Supplementary material for: A Systematic Enhancer Screen Using Lentivector Transgenesis Identifies Conserved and Non-Conserved Functional Elements at the Olig1 and Olig2 Locus
Source: PubMed Central journal article supplement (PMC3012086; doi:10.1371/journal.pone.0015741), 2010-12-29
Supplement: pone.0015741.s004.pdf [file pone.0015741.s004.pdf]

**Table S4**

| Relative to 5F7 (kb) | Forward primer (bait)    | Reverse primer (target)  | TaqMan probe (ligation site)                 |
|----------------------|--------------------------|--------------------------|----------------------------------------------|
| <b>-101.9</b>        | GCATAGGCATGTTCTTTTTTCAAA | GGCTCCCAAATGTTTAGAATCACT | TCTTTAAACAGAAGCAGGCAGGTAGCT <b>GATC</b> CCTA |
| <b>-22</b>           | GCATAGGCATGTTCTTTTTTCAAA | CAGAGAGGTCAGGGTCAGTAAAGC | AGGCAGGTAGCT <b>GATC</b> CCTCTGGTGTGT        |
| <b>-15.1</b>         | GCATAGGCATGTTCTTTTTTCAAA | AAGCCTTGCACTGATGAGTATCTG | AGAAGCAGGCAGGTAGCT <b>GATC</b> TGC           |
| <b>1.1</b>           | CAGCATAGGCATGTTCTTTTTTCA | CCTTCAGCCCTTGGCTTGA      | TTTAAACAGAAGCAGGCAGGTAGCT <b>GATC</b> TAGTCC |
| <b>3.3</b>           | TCTTTAAACAGAAGCAGGCAGGTA | TCAACAGAGGCAGCATGCAT     | CT <b>GATC</b> CAGCCTTCATTCTCTGAA            |
| <b>4.4</b>           | AGCATAGGCATGTTCTTTTTTCAA | GCAGTTTATGGGCCATGTCA     | CAGGCAGGTAGCT <b>GATC</b> TTCTCCTAG          |
| <b>5.8</b>           | TCTTTAAACAGAAGCAGGCAGGTA | GGCAACCAGGACCTACAACATC   | CT <b>GATC</b> AGGATTCACCCTAGGCCAACTTACGTA   |
| <b>9.7</b>           | TCTTTAAACAGAAGCAGGCAGGTA | TGAATGGTGCAGCCCTACAC     | CT <b>GATC</b> CACCCAATCCCCTTTAAC            |
| <b>14.5</b>          | TCTTTAAACAGAAGCAGGCAGGTA | CCCGAAGGAGGCATCTACAA     | CT <b>GATC</b> CAGAAAGGGCTCGGGCA             |
| <b>35.1</b>          | TCTTTAAACAGAAGCAGGCAGGTA | AGCCACACAAAGCCATCCAT     | CT <b>GATC</b> ATGACAGTTAAGGATTCAAATAGA      |
| <b>54.9</b>          | GCATAGGCATGTTCTTTTTTCAAA | CTCCCCCTGGTGGTCTAATCTG   | TAAACAGAAGCAGGCAGGTAGCT <b>GATC</b> TGACT    |
